# Supplementary material
Source: ML conference proceedings conference paper supplement (https://openaccess.thecvf.com/content/CVPR2024/html/Chen_DemoCaricature_Democratising_Caricature_CVPR_2024_paper.html)
Supplement: Supplementary file 1 [file Chen_DemoCaricature_Democratising_Caricature_CVPR_2024_supplemental.pdf]

# Supplementary material for *DemoCaricature: Democratising Caricature Generation with a Rough Sketch*

Dar-Yen Chen      Ayan Kumar Bhunia      Subhadeep Koley      Aneeshan Sain  
Pinaki Nath Chowdhury      Yi-Zhe Song  
SketchX, CVSSP, University of Surrey, United Kingdom.

{d.chen, a.bhunia, s.koley, a.sain, p.chowdhury, y.song}@surrey.ac.uk

<https://democaricature.github.io>

## A. Details on Random Mask Reconstruction

We present further implementation details on the random mask reconstruction (RMR) as shown in Fig. 1. We create the masked image  $x_0^m$  by randomly occluding several patches with different ratios to simulate a caricature having local variation. Besides the random occlusion, we also apply id- and style-specific masks on  $M$  to isolate regions of interest when calculating loss using Eq. (5). Specifically, for identity finetuning,  $M$  contains a binary mask over the background, making the model capture the distinguishing facial features exclusively. For style reference,  $M$  adopts a small value (0.2 in this work) on the face area, subtly nudging the model to infuse the stylistic elements from both the background and the face into caricatures.

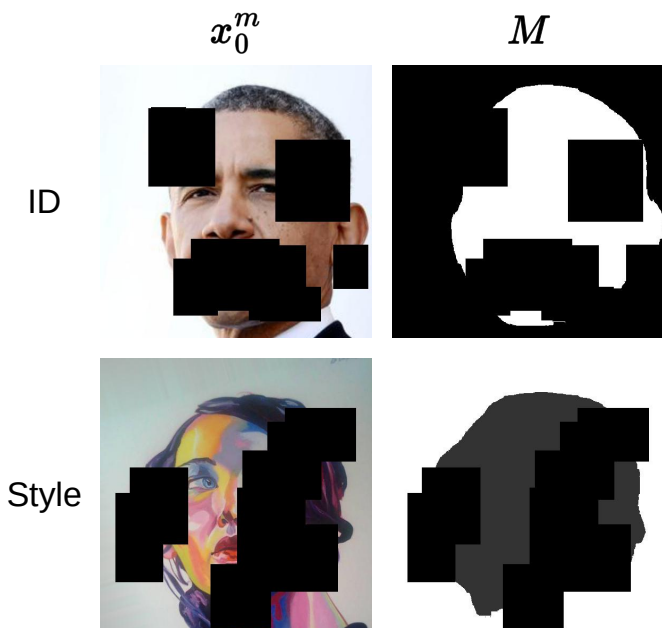

Figure 1. **Random Mask Reconstruction.**  $x_0^m$  mimics an image with local variation, a critical feature of caricature.  $M$  makes the objective function focus on the region of interest and ignore the occluded area.

## B. More Qualitative Results

In this section, we provide additional qualitative results across various fields. Fig. 2 showcases more caricatures of celebrities. Beyond celebrities, we exhibit our method’s capability of learning identity and style from artistic and synthetic<sup>1</sup> portraits in Fig. 3 and Fig. 4 respectively. The results demonstrate the versatility of our democratising caricature generation, allowing users to flexibly and artistically create caricatures with the desired identities and styles.

<sup>1</sup>We collect the synthetic id image from Ruiz *et al.* [1] and synthetic style reference from <https://civitai.com>.

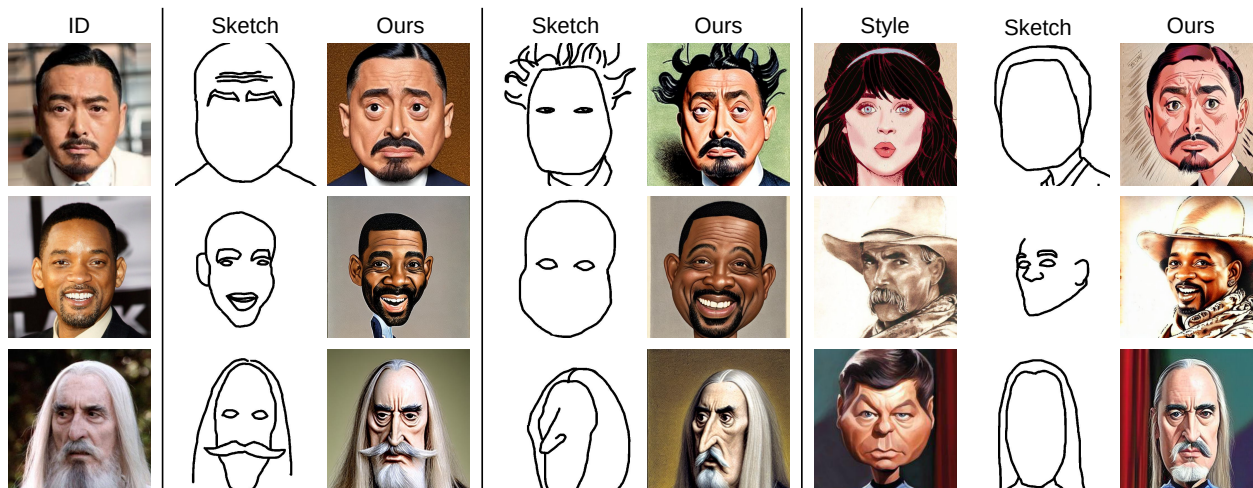

Figure 2. Results on celebrities.

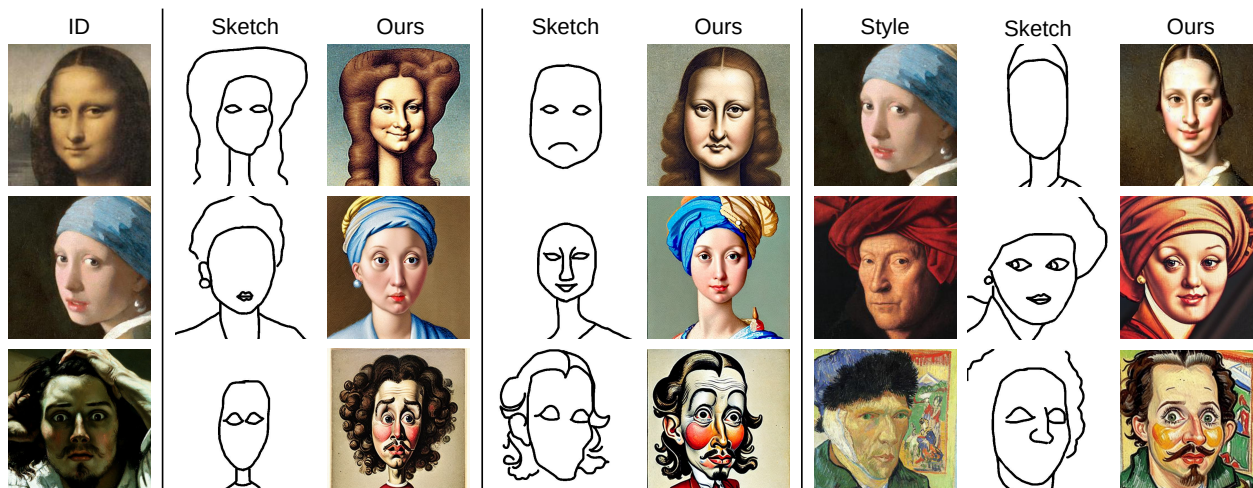

Figure 3. Results on famous artworks.

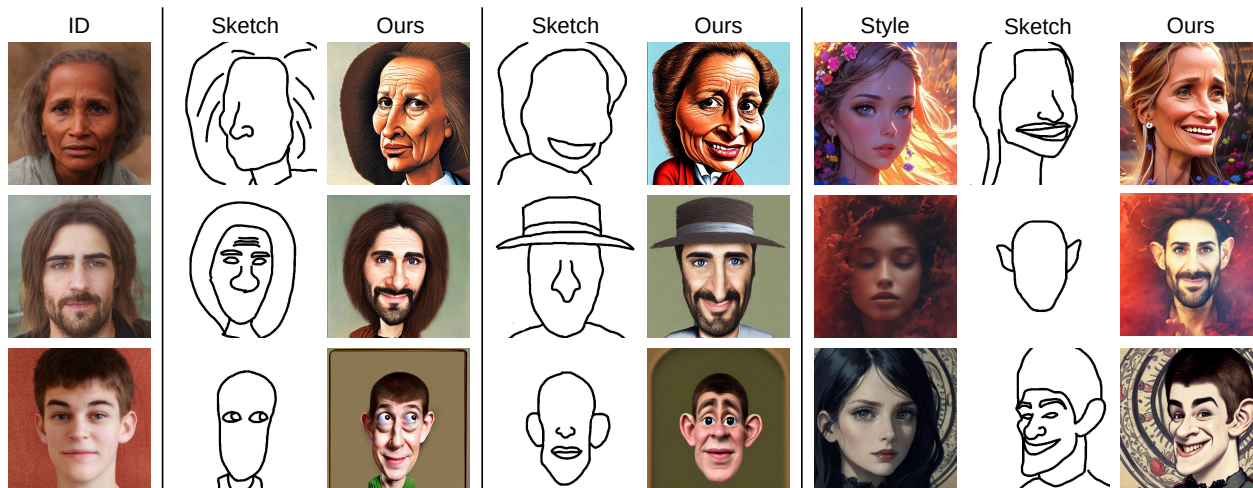

Figure 4. Results on synthetic human faces.

## References

- [1] Nataniel Ruiz, Yuanzhen Li, Varun Jampani, Wei Wei, Tingbo Hou, Yael Pritch, Neal Wadhwa, Michael Rubinstein, and Kfir Aberman. HyperDreamBooth: HyperNetworks for Fast Personalization of Text-to-Image Models, 2023. 1
